# Supplementary material
Source: MDPI journal article supplement (https://www.mdpi.com/2077-0472/12/11/1839)
Supplement: s1 [file s1]

## Supplementary Materials:

**Table S1.** Result of effective band screening based on CARS method

| Method | Number of Bands | Wavelength (nm)                                                                                                                                                                                                                                                                                                                                 |
|--------|-----------------|-------------------------------------------------------------------------------------------------------------------------------------------------------------------------------------------------------------------------------------------------------------------------------------------------------------------------------------------------|
| CARS   | 67              | 465, 467, 475, 480, 482, 488, 505, 515, 517, 535, 536, 537, 596, 679, 714, 716, 718, 730, 737, 746, 747, 750, 753, 757, 778, 782, 782, 793, 818, 824, 828, 839, 841, 842, 854, 858, 860, 865, 866, 868, 879, 883, 886, 893, 903, 910, 912, 913, 933, 942, 944, 945, 956, 957, 959, 962, 963, 966, 972, 979, 981, 982, 986, 989, 991, 1002, 1004 |

**Table S2.** Parameter setting of three regression models (PLS, ANN and SVM) based on different band combinations

| Bands     | Models | Setting of parameters                                      |
|-----------|--------|------------------------------------------------------------|
| All bands | PLS    | nLVs = 5                                                   |
|           | ANN    | topo = ['HHH', 'L--'], epochs = 5                          |
|           | SVM    | linear kernel function, p = 0.16, c = 194, g = 0.00097656  |
| CARS      | PLS    | nLVs = 10                                                  |
|           | ANN    | topo = ['HHH', 'L--'], epochs = 5                          |
|           | SVM    | linear kernel function, p = 0.11, c = 1024, g = 0.00296038 |
